# Supplementary material for: Astrocytic lipid metabolism determines susceptibility to diet-induced obesity
Source: PubMed Central journal article supplement — Sci Adv. 2021 Dec 10;7(50):eabj2814. doi: 10.1126/sciadv.abj2814 (PMC11323787; doi:10.1126/sciadv.abj2814), 2021-12-10
Supplement: sciadv.abj2814_sm.pdf [file sciadv.abj2814_sm.pdf]

Supplementary Materials for  
**Astrocytic lipid metabolism determines susceptibility to diet-induced obesity**

Luis Varela\*, Jae Geun Kim, Pablo Fernández-Tussy, Binod Aryal, Zhong Wu Liu,  
Carlos Fernández-Hernando, Tamas L. Horvath\*

\*Corresponding author. Email: [luis.varela@yale.edu](mailto:luis.varela@yale.edu) (L.V.); [tamas.horvath@yale.edu](mailto:tamas.horvath@yale.edu) (T.L.H.)

Published 10 December 2021, *Sci. Adv.* **7**, eabj2814 (2021)  
DOI: [10.1126/sciadv.abj2814](https://doi.org/10.1126/sciadv.abj2814)

**This PDF file includes:**

Figs. S1 to S5

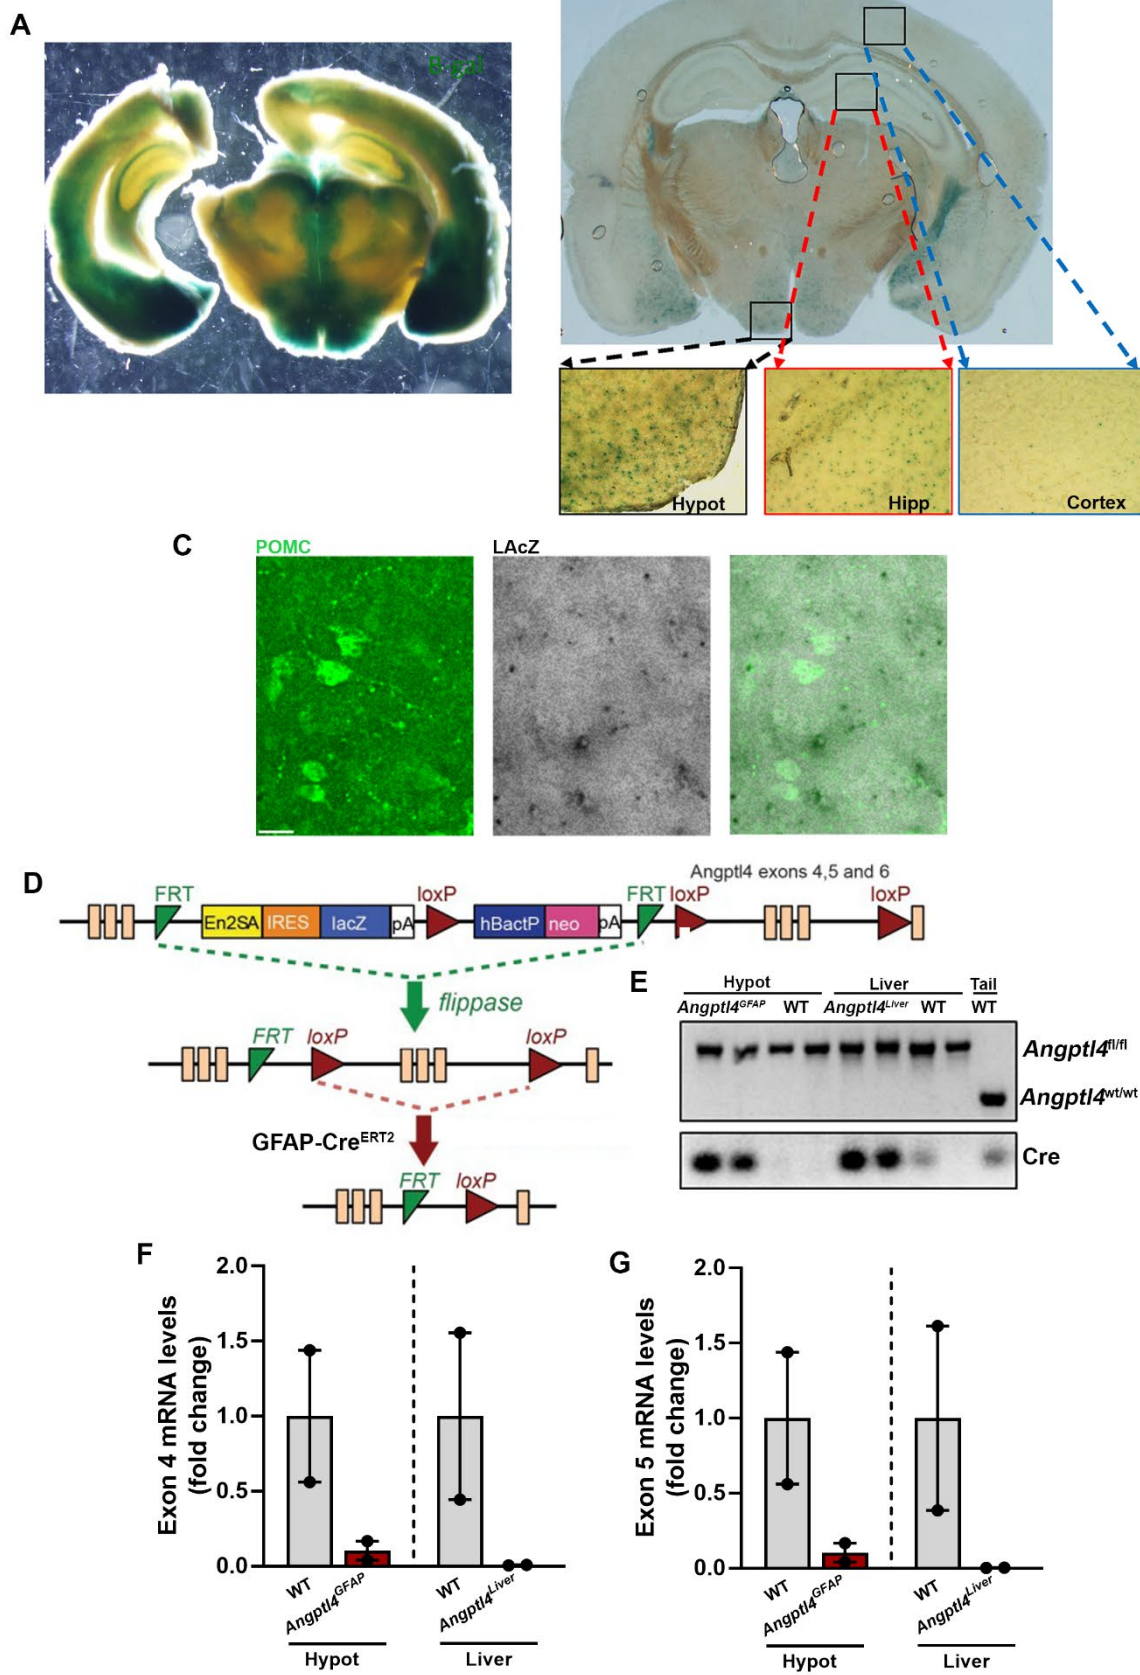

**Fig. S1. *Angptl4* expression is downregulated in *Angptl4*<sup>GFAP</sup> mice.** (A) Low magnification image of LacZ staining in the brain (coronal section = 300 μm). (B) High resolution image of LacZ expression in the brain (coronal section=50 μm). Inserts show high magnification of three different areas of the brains (Hypot=hypothalamus, Hipp =Hippocampus). (C) Representative images showing lack of colocalization of POMC neurons and LacZ (scale bar = 20μm). (D) Schematic diagram illustrating the generation of astrocyte-specific ANGPTL4 (*Angptl4*<sup>GFAP</sup>) mice. (E) PCR amplification of *Angptl4*<sup>fl/fl</sup> mice displaying bands from both or none of the alleles floxed. As control, we show the PCR amplification bands from the liver of our previously reported mice loosing *Angptl4* specifically in liver (*Angptl4*<sup>Liver</sup>). mRNA expression of *Angptl4* (F) exon 4 and (G) exon 5 from hypothalamus of WT and *Angptl4*<sup>GFAP</sup>. As a positive control, we also show the mRNA expression in livers from our previously described *Angptl4*<sup>Liver</sup> mice.

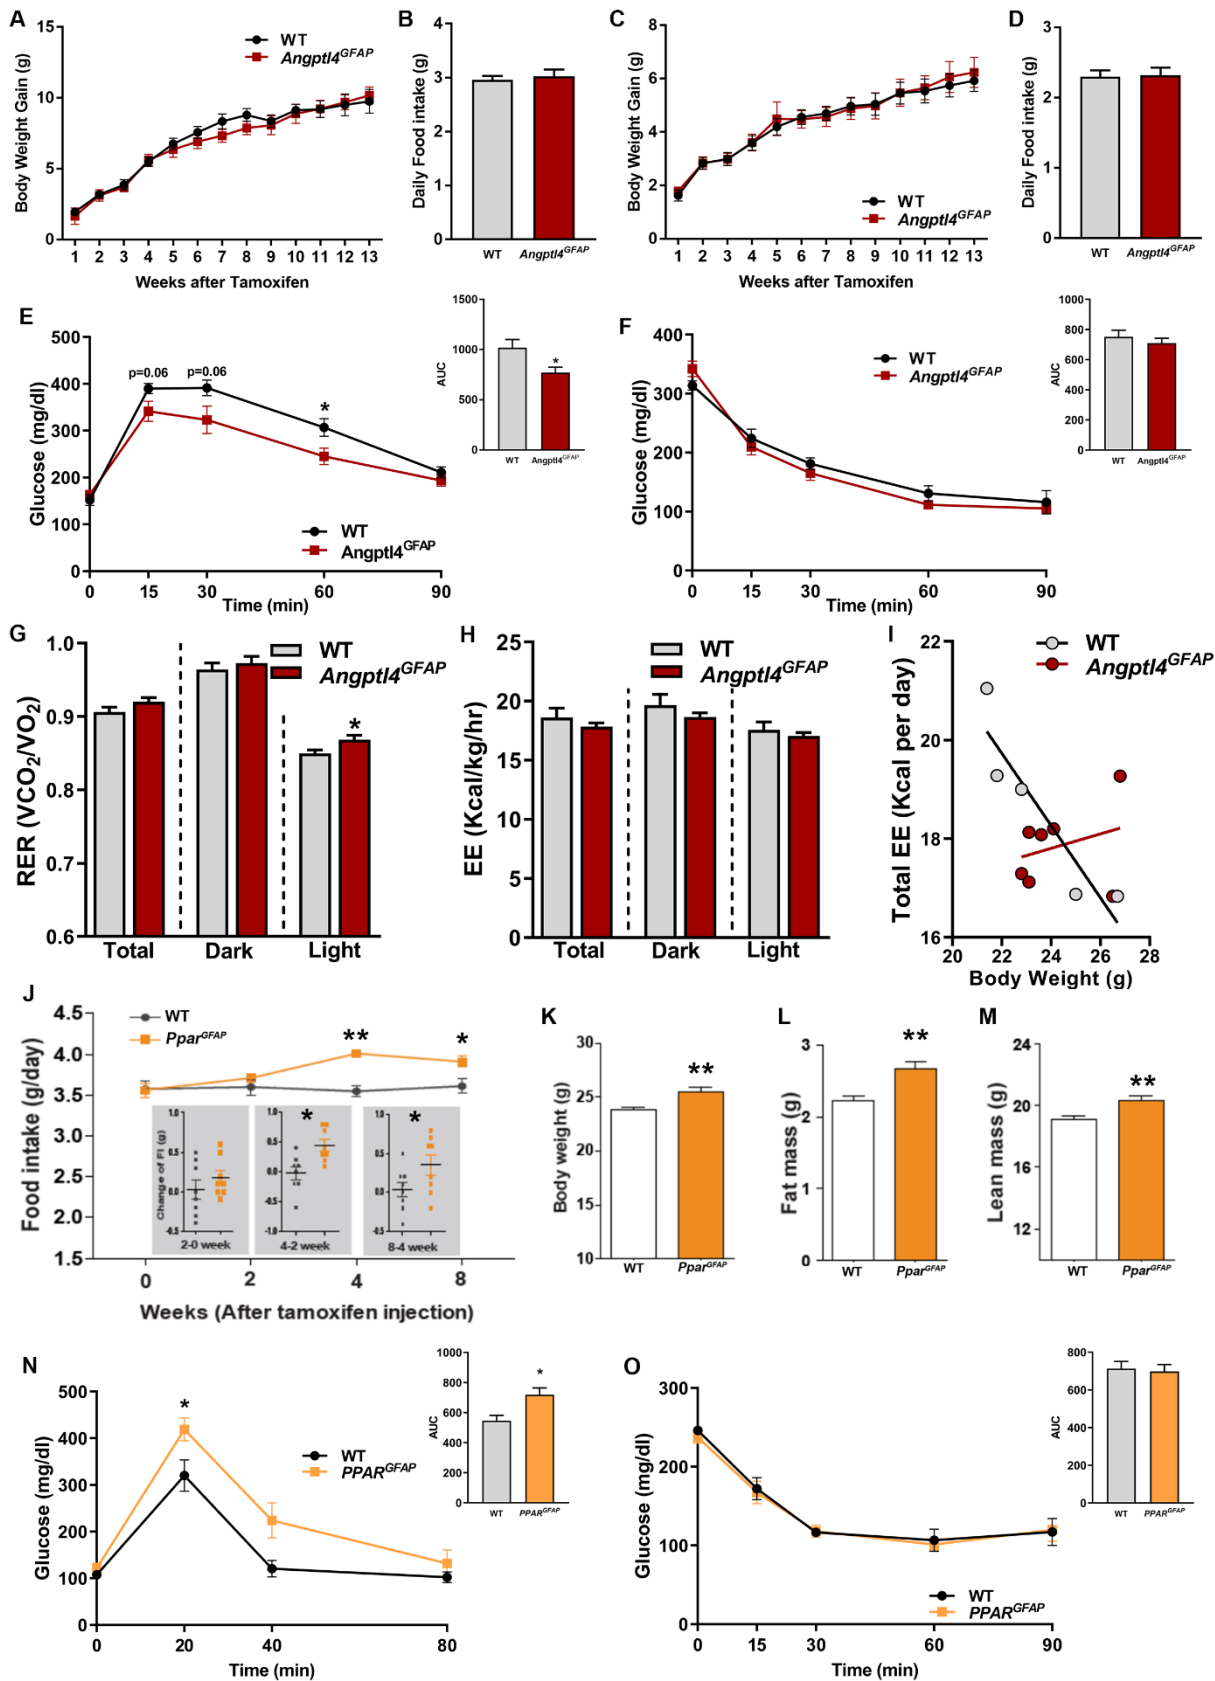

**Fig. S2. Metabolic characterization of *Angptl4*<sup>GFAP</sup> and *Ppar*<sup>GFAP</sup> mice on chow diet.** Body weight gain of *Angptl4*<sup>GFAP</sup> (A) male and (C) female mice and their control littermates eating a chow diet (CD). Daily food intake of *Angptl4*<sup>GFAP</sup> (B) male and (D) female mice and their controls eating a CD (males: n = 10/9 mice per group; females: 10/9 mice per group). (E) Glucose tolerance test (GTT) and AUC, and (F) Insulin tolerance test (ITT) and AUC in *Angptl4*<sup>GFAP</sup> mice and their control littermates on CD (n = 9 mice per group). (G) RER and (H and I) Energy Expenditure of *Angptl4*<sup>GFAP</sup> mice and their control littermates on CD (n = 5/7 mice per group). (J) Weekly food intake of *Ppar*<sup>GFAP</sup> mice and their control littermates fed a CD. (K) Body weight, (L) Fat mass and (M) Lean mass of *Ppar*<sup>GFAP</sup> mice and their control littermates fed a CD (n = 8 mice per group). (N) Glucose tolerance test and AUC, and (O) Insulin tolerance test and AUC in *Ppar*<sup>GFAP</sup> mice and their control littermates fed a CD (n = 4/6 mice per group respectively). Data are presented as mean ± SEM. \*p ≤ 0.05 and \*\*p ≤ 0.01 as determined by two-tailed t-test.

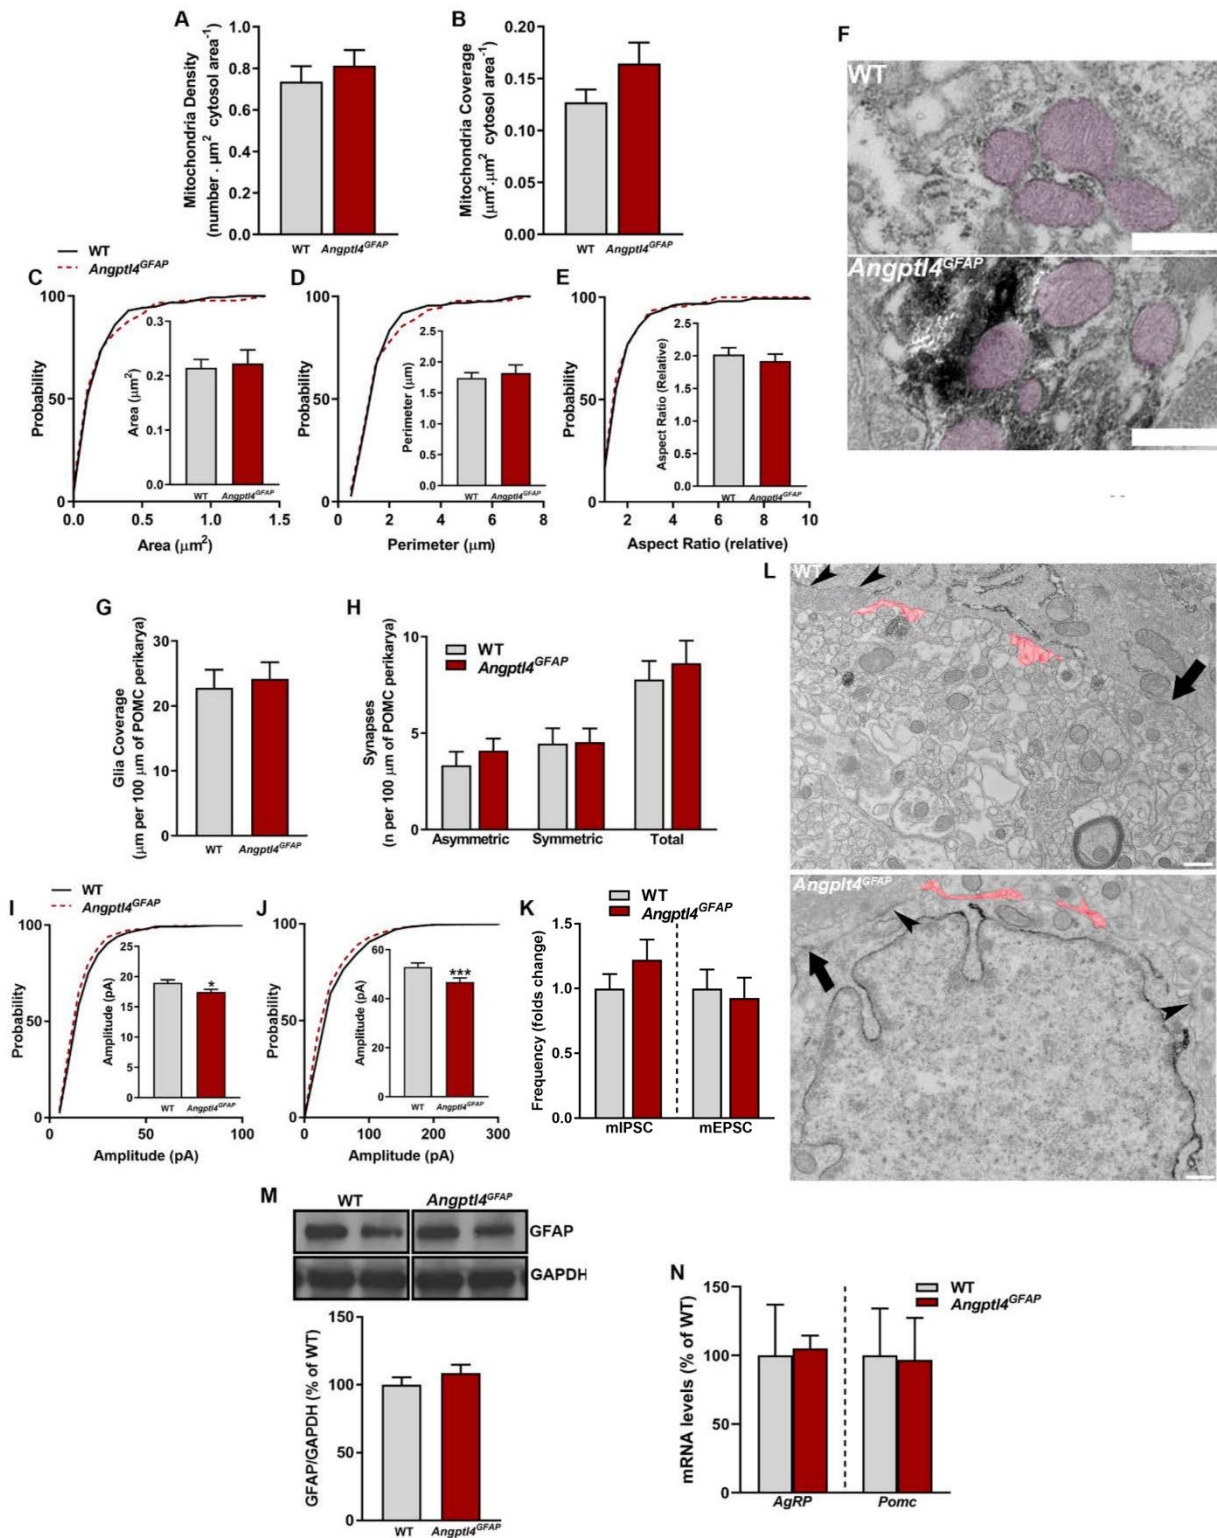

**Fig. S3. Astrocytic Mitochondria morphology and synaptic events onto POMC neurons on *Angptl4*<sup>GFAP</sup> mice on chow diet.** Mitochondria (A) density and (B) coverage from MBH astrocytes of *Angptl4*<sup>GFAP</sup> mice and their control littermates fed a chow diet (CD). Cumulative Distribution and mean of mitochondria (C) area, (D) perimeter and (E) aspect ratio from MBH astrocytes of *Angptl4*<sup>GFAP</sup> mice and their control littermates fed a CD (n >90 mitochondria from >12 astrocytes from 4/5 mice per group respectively). (F) Representative electron micrographs from MBH astrocytes of *Angptl4*<sup>GFAP</sup> mice and their control littermates fed a CD (scale bar=500nm). (G) Glia Coverage and (H) Number of synapses per 100µm of POMC perikarya of *Angptl4*<sup>GFAP</sup> mice and their controls fed a CD (n = 15/21 neurons per group). Electrophysiological recordings showing the amplitude of (I) mIPSC and (J) mEPSC, and (K) frequency of mIPSC and mEPSC from POMC neurons of *ANGPTL4*<sup>GFAP</sup> mice and their control littermates fed a chow diet (n = 18 cells from 4 mice per group). (L) Representative electron micrographs showing glia coverage and synaptic events onto the POMC perikarya of *Angptl4*<sup>GFAP</sup> mice and their control littermates fed a chow diet. Red trace illustrates glia coverage. Arrowheads depict symmetric synapses. Arrows depict asymmetric synapses. (Scale bar=500nm). (M) Quantification and representative blots (from the same film) showing the levels of GFAP levels in the MBH of *Angptl4*<sup>GFAP</sup> mice and their controls on chow diet (n = 5 mice per group respectively). (N) *AgRP* and *Pomc* mRNA levels in MBH of *Angptl4*<sup>GFAP</sup> mice and their controls on CD. Data are presented as mean ± SEM. \*\*\*p≤ 0.001 as determined by two-tailed t-test or Kolmogorov-Smirnov test for analyses of cumulative distribution.

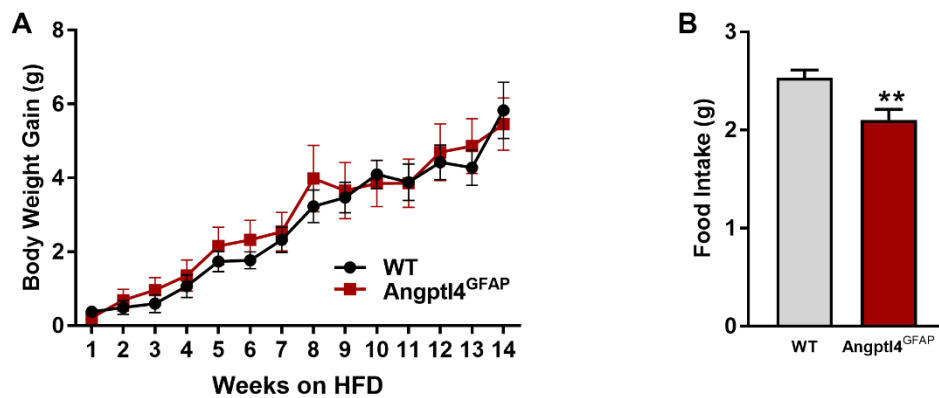

**Fig S4. Metabolic phenotype of *Angptl4*<sup>GFAP</sup> female mice during HFD treatment.** (A) Weekly Body weight gain and (B) daily food intake of *Angptl4*<sup>GFAP</sup> female mice and their control littermates during chronic exposure to HFD. Data are presented as mean  $\pm$  SEM. \*\* $p \leq 0.01$  as determined by two-tailed t-test

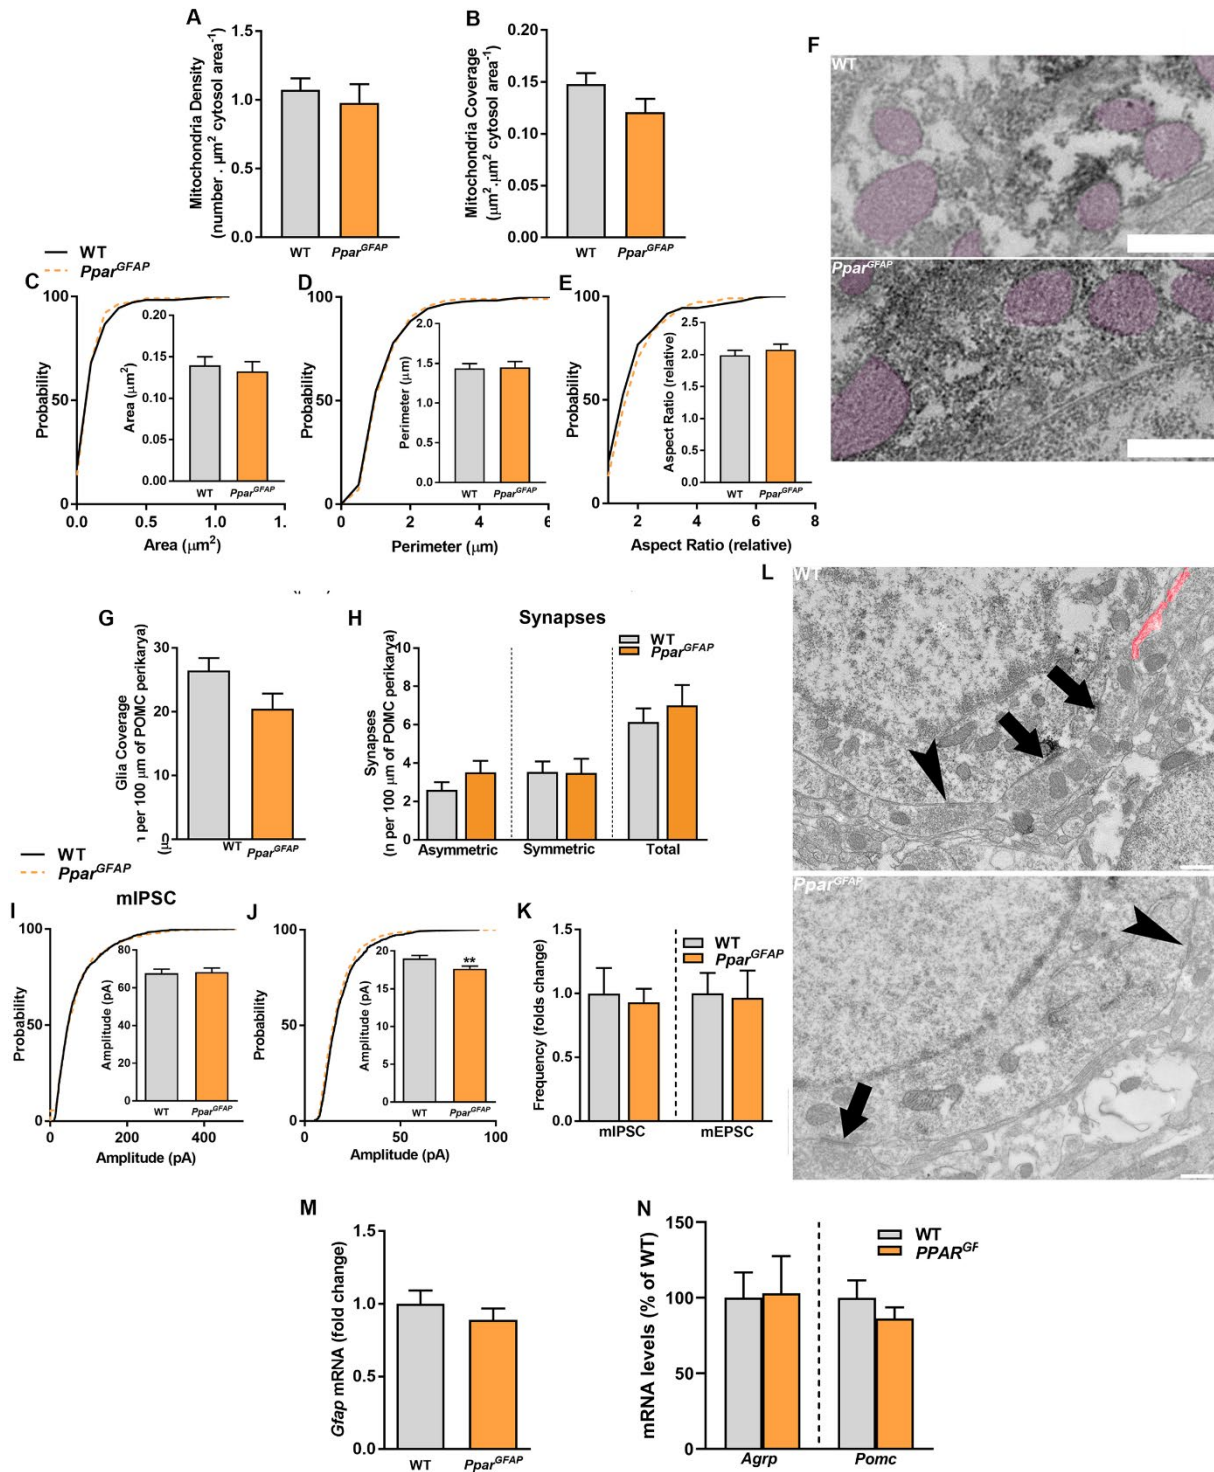

**Fig. S5. Astrocytic Mitochondria morphology and synaptic events onto POMC neurons on *Ppar*<sup>GFAP</sup> mice on chow diet.** Mitochondria (A) density and (B) coverage from MBH astrocytes of *Ppar*<sup>GFAP</sup> mice and their control littermates fed a chow diet (CD). Cumulative Distribution and mean of mitochondria (C) area, (D) perimeter and (E) aspect ratio from MBH astrocytes of *Ppar*<sup>GFAP</sup> mice and their control littermates fed a CD (n > 114 mitochondria from >13 astrocytes from 4/3 mice per group respectively). (F) Representative electron micrographs from MBH astrocytes of *Ppar*<sup>GFAP</sup> mice and their control littermates fed a CD (scale bar=500nm). (G) Glia Coverage and (H) Number of synapses per 100µm of POMC perikarya of *Ppar*<sup>GFAP</sup> mice and their controls fed a CD (n = 24/18 neurons from 5/4 mice per group respectively). Electrophysiological recordings showing the amplitude of (I) mIPSC and (J) mEPSC, and (K) frequency of mIPSC and mEPSC from POMC neurons of *Ppar*<sup>GFAP</sup> mice and their control littermates fed a chow diet (n = 16/15 neurons from 3 mice per group). (L) Representative electron micrographs showing glia coverage and synaptic events onto the POMC perikarya of *Ppar*<sup>GFAP</sup> mice and their control littermates fed a chow diet. Red trace illustrates glia coverage. Arrowheads depict symmetric synapses. Arrows depict asymmetric synapses. (Scale bar=500nm). (M) *Gfap* mRNA levels in the MBH of *Ppar*<sup>GFAP</sup> mice and their controls on CD (n = 4/5 mice per group respectively). (N) *AgRP* and *Pomc* mRNA levels in MBH of *Ppar*<sup>GFAP</sup> mice and their controls on CD. Data are presented as mean ± SEM. \*\*p≤ 0.01 as determined by two-tailed t-test or Kolmogorov-Smirnov test for analyses of cumulative distribution.
